# Supplementary material for: Functional Activity in the Effect of Transcranial Magnetic Stimulation Therapy for Patients with Depression: A Meta-Analysis
Source: MDPI journal article supplement (doi:10.3390/jpm13030405), 2023-02-24
Supplement: s1 [file s1]

**Table S1.** TMS details of included studies.

| Year | Author             | Type                          | Target      | Frequency | Intensity | Number of Trains and Durations | Intertrain interval | Pulse per secession | Session frequency                      | Total sessions |
|------|--------------------|-------------------------------|-------------|-----------|-----------|--------------------------------|---------------------|---------------------|----------------------------------------|----------------|
| 2004 | Xingbao Li         | rTMS                          | left DLPFC  | 100% MT   | 1Hz       | 21 trains of 21s               | 21s                 | N.A.                | N.A.                                   | 7              |
| 2007 | Paul B. Fitzgerald | low-frequency right-sided TMS | right DLPFC | 110% MT   | 1Hz       | 4 trains of 180 s              | 30s                 | 12                  | 5 days per week, 10 secessions per day | 150            |
|      |                    | high-frequency left-sided TMS | left DLPFC  | 100% MT   | 10Hz      | 30 trains of 5 s               | 25s                 | 160                 | 5 days per week, 10 secessions per day | 150            |
| 2018 | Andrada D. Neacsiu | rTMS                          | left DLPFC  | 120% MT   | 10Hz      | 75 trains of 4s                | 26s                 | 3000                | 5 days per week, 1 secession per day   | 20             |
| 2020 | Anhai Zheng        | rTMS                          | left DLPFC  | 100% MT   | 10Hz      | 50 trains of 20 min            | 21s                 | 1500                | five sessions per week                 | 10             |
| 2022 | Zhou Biao          | rTMS                          | left DLPFC  | 100% MT   | 20Hz      | 50 trains of 2s                | 28s                 | 2000                | five sessions per week                 | 15             |

DLPFC, dorsolateral prefrontal cortex; MT, motor threshold.

**Table S2.** MRI details of included studies.

| Year | Author             | Software                       | Imaging modalities | Statistical threshold | Correction step            | Coordinates space | Task                     |
|------|--------------------|--------------------------------|--------------------|-----------------------|----------------------------|-------------------|--------------------------|
| 2004 | Xingbao Li         | Sun workstations               | 1.5-T MRI          | P<0.05                | cluster statistical weight | Talairach         | None                     |
| 2007 | Paul B. Fitzgerald | fixed response boxcar function | 1.5-T MRI          | P<0.05                | uncorrected                | Talairach         | the Tower of London task |
| 2018 | Andrada D. Neacsu  | FSL                            | 3-T MRI            | P<0.005               | voxel-level correction     | MNI               | The goal priming task    |
| 2020 | Anhai Zheng        | SPM8                           | 3-T MRI            | P<0.05                | cluster-level correction   | MNI               | None                     |
| 2022 | Zhou Biao          | DPARSF                         | 3-T MRI            | p<0.05                | uncorrected                | MNI               | None                     |

MNI, Montreal Neurological Institute space; MRI, magnetic resonance imaging.
